# Supplementary material
Source: PubMed Central journal article supplement (PMC11382950)
Supplement: PBI-20-1874-s001.pdf [file PBI-20-1874-s001.pdf]

**Supplementary files for “Multi-omics profiling reveals comprehensive microbe-plant-metabolite regulation patterns for medicinal plant *Glycyrrhiza uralensis* Fisch”**

Chaofang Zhong<sup>1,2</sup>, Chaoyun Chen<sup>1</sup>, Xi Gao<sup>1</sup>, Chongyang Tan<sup>1</sup>, Hong Bai<sup>1,\*</sup>, Kang Ning<sup>1,\*</sup>

<sup>1</sup>Key Laboratory of Molecular Biophysics of the Ministry of Education, Hubei Key Laboratory of Bioinformatics and Molecular-imaging, Center of AI Biology, Department of Bioinformatics and Systems Biology, College of Life Science and Technology, Huazhong University of Science and Technology, Wuhan 430074, Hubei, China

<sup>2</sup>Key Laboratory of Karst Biodiversity and Ecological Security, College of Environmental and Life Sciences, Nanning Normal University, Nanning 530001, China

\*Correspondence should be addressed to Kang Ning (Email: ningkang@hust.edu.cn) and Hong Bai (Email: baihong@hust.edu.cn)

## Supplementary Figures

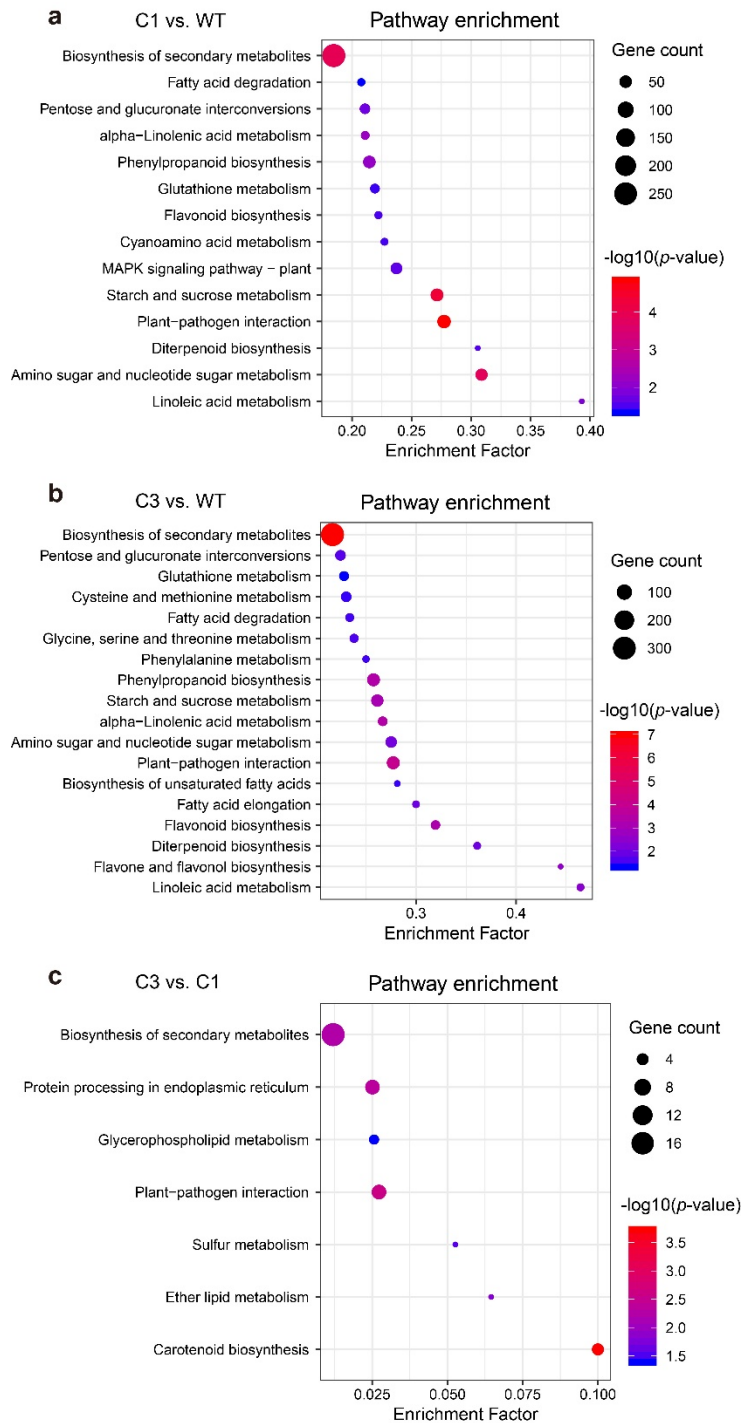

**Supplementary Figure S1. KEGG pathways with the most significant enrichment of DEGs in the three groups of *G. uralensis*.** (a) C1 vs. WT, (b) C3 vs. WT, (c) C3 vs. C1. The degree of enrichment was measured by the rich factor, FDR value and the number of genes enriched to each KEGG term. Rich factor referred to the ratio of the number of DEGs enriched in each term to the number of all DEGs annotated. The greater enrichment factor, the greater enrichment. The closer to

zero, the greater enrichment. The circle size referred to the number of genes enriched to each KEGG term. WT: wild type; C1: cultivated for one year; C3: cultivated for three years.

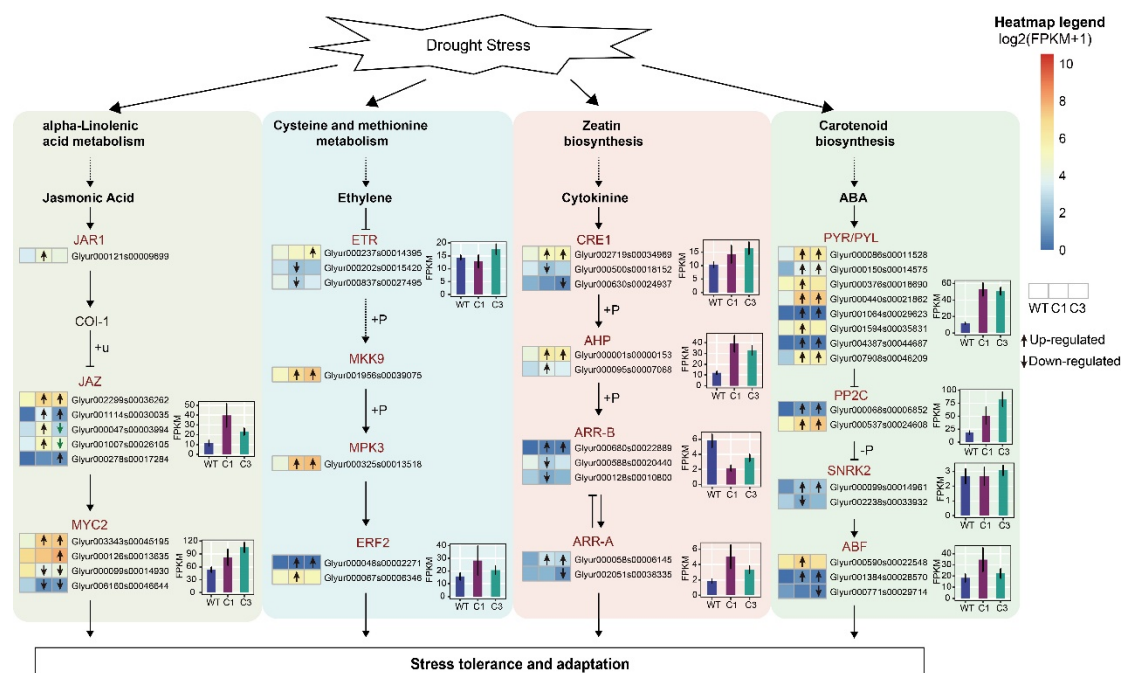

**Supplementary Figure S2. Expression patterns of genes involved in plant hormone signal transduction pathways.** Enzymes encoded by the differentially expressed genes were marked in red and the heatmap shows log<sub>2</sub> (FPKM+1) values of each DEGs. Each row of heatmap represented one gene and each column represents one a group (from left to right, WT, C1, C3). The black arrow in the heatmap indicated that up (arrow up) or down (arrow down) regulation of C1 and C3 compared to wild, respectively. The bar box showed the average FPKM of genes encoding the same enzymes. WT: wild type; C1: cultivated for one year; C3: cultivated for three years.

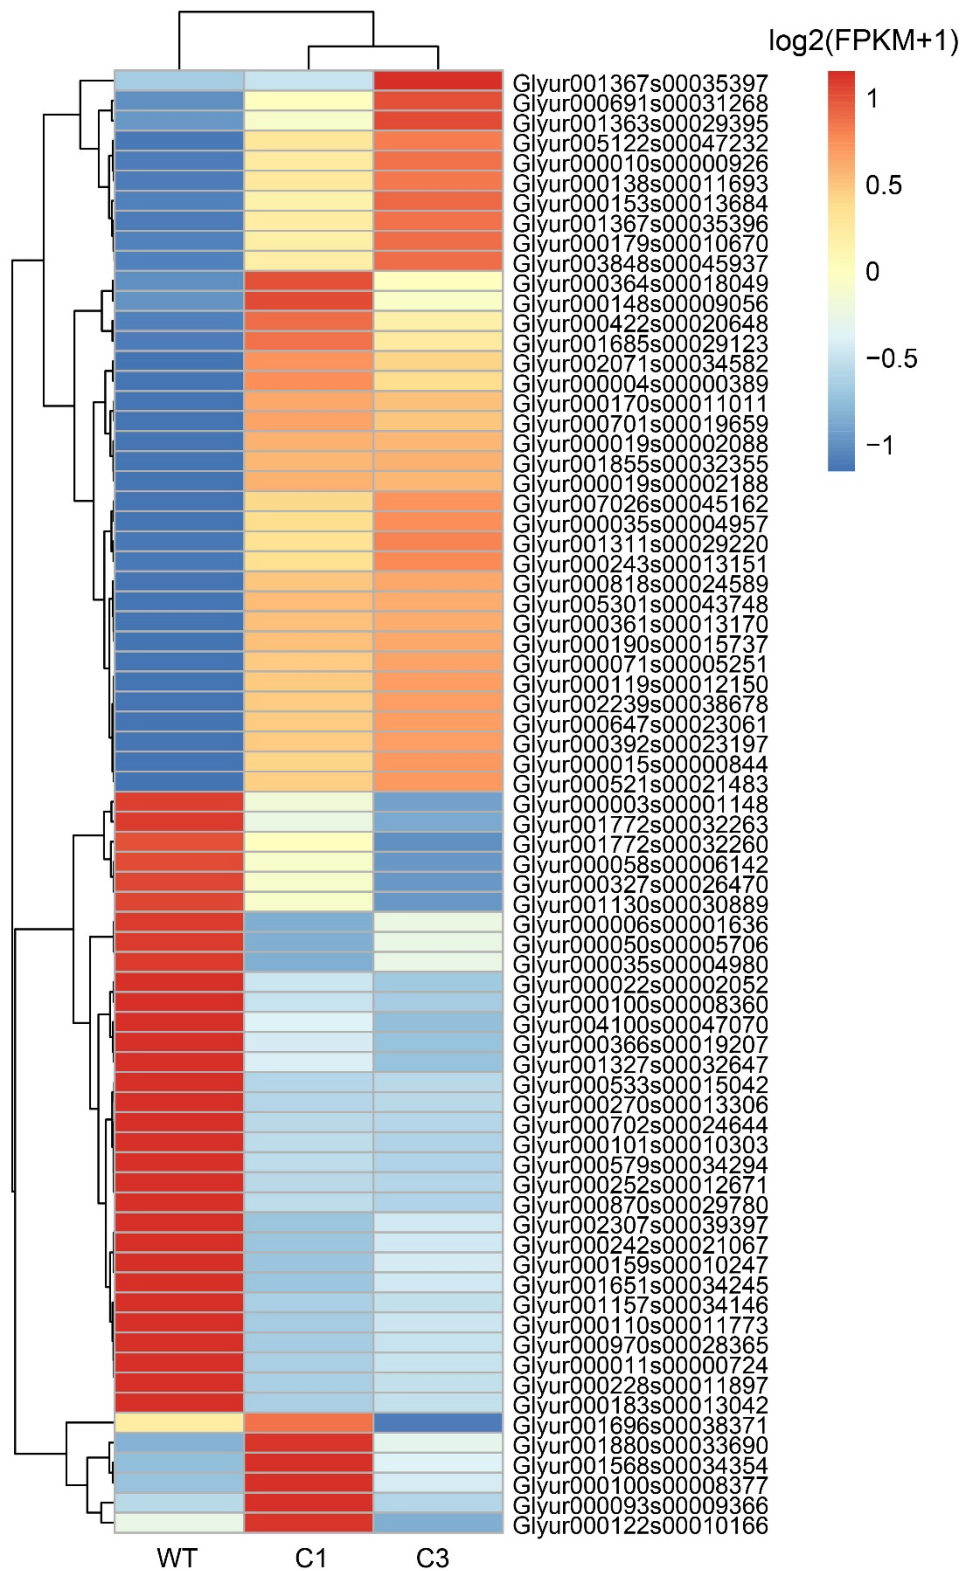

**Supplementary Figure S3. Expression patterns of genes involved in plant-pathogen interaction.** Each row of heatmap represented one gene and each column represented one a group (from left to right, WT, C1, C3). The heatmap was scaled in the row direction based on the FPKM of genes. WT: wild type; C1: cultivated for one year; C3: cultivated for three years.

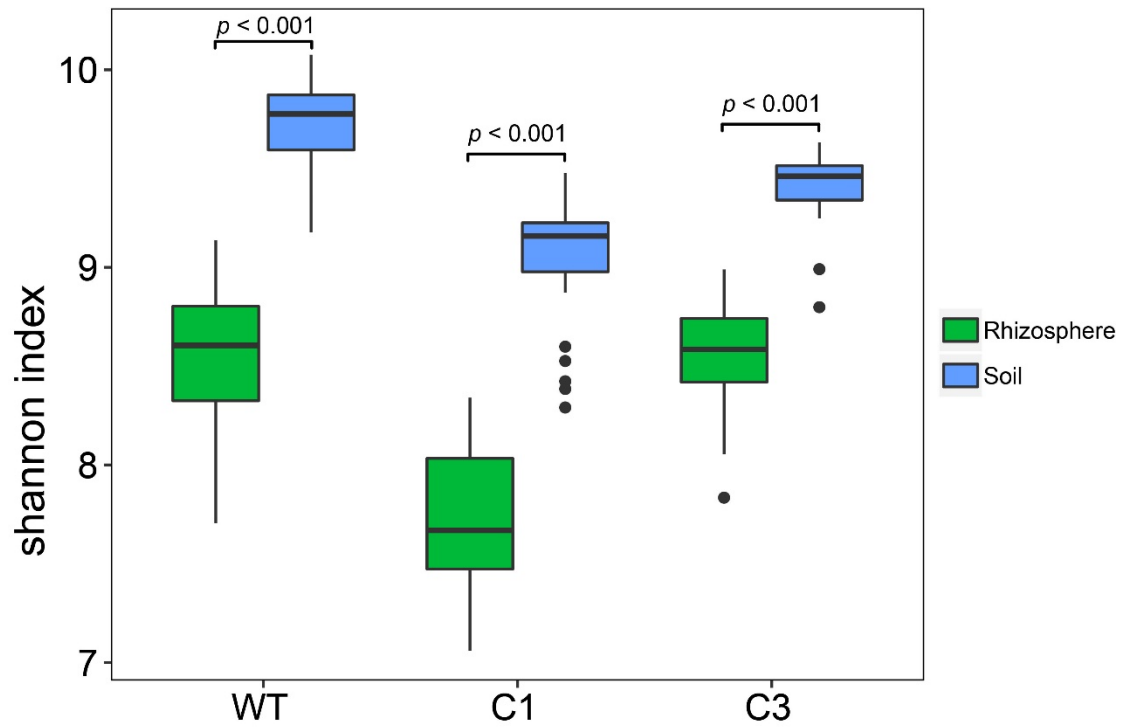

**Supplementary Figure S4. The comparison of microbial community diversities between the rhizosphere and soil.** WT: wild type; C1: cultivated for one year; C3: cultivated for three years.

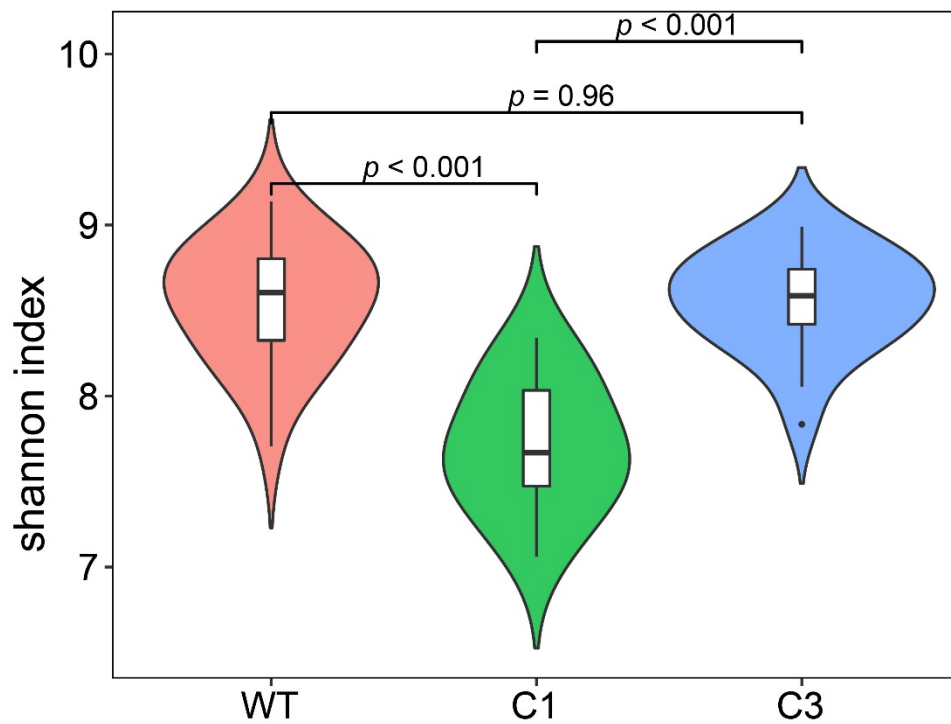

**Supplementary Figure S5. The comparison of rhizosphere microbial community diversity between wild, C1 and C3 *G. uralensis*.** WT: wild type; C1: cultivated for one year; C3: cultivated for three years.

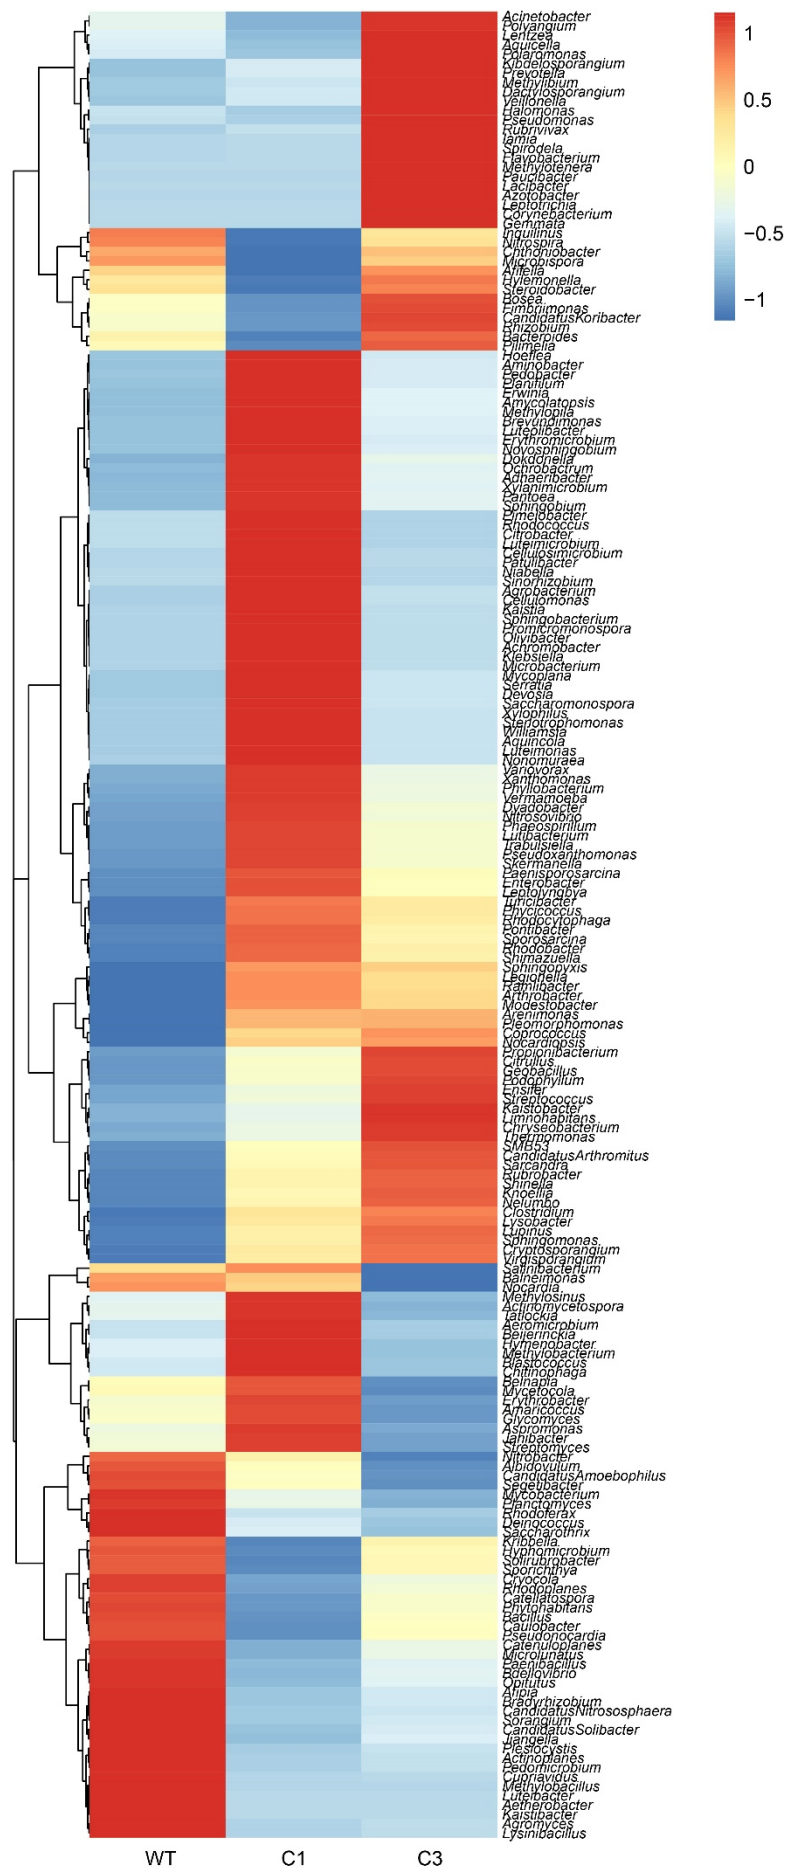

**Supplementary Figure S6. Marker genera in rhizosphere samples of wild, C1 and C3 *G. uralensis*.** The heatmap was scaled in the row direction based on the microbial relative abundance. WT: wild type; C1: cultivated for one year; C3: cultivated for three years.

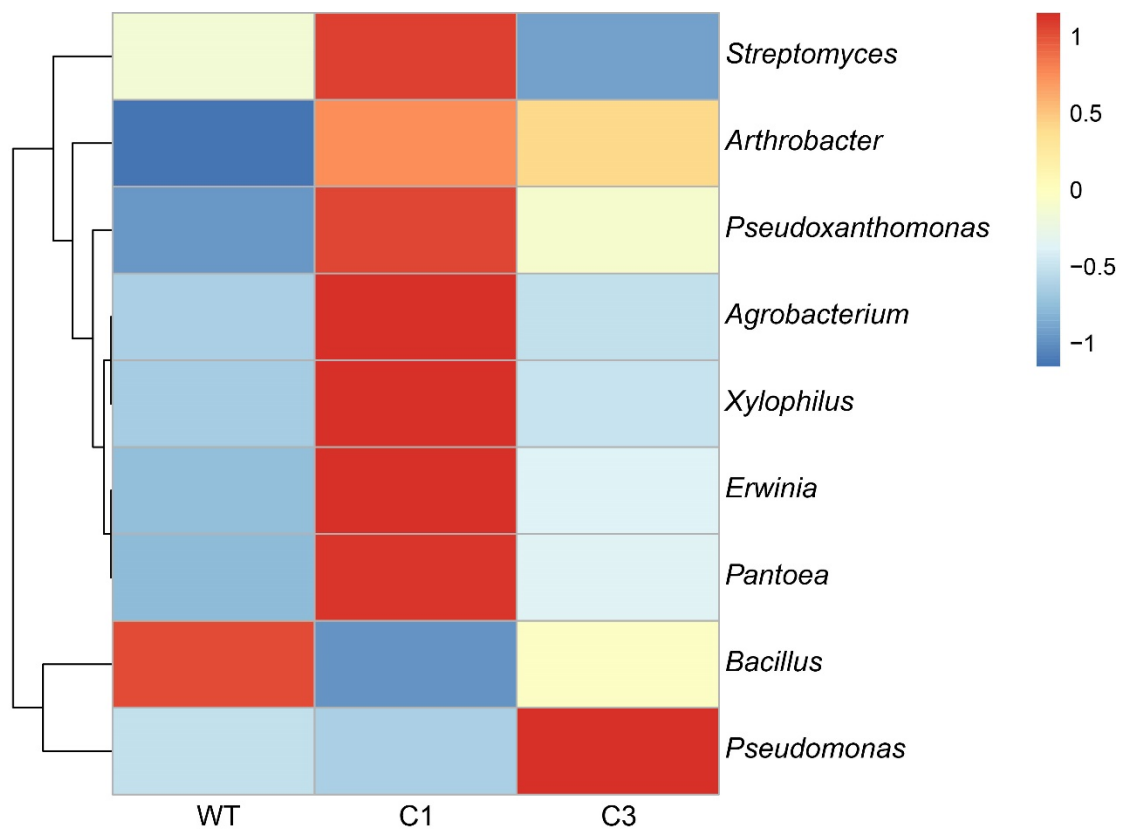

**Supplementary Figure S7. Marker pathogen genera in rhizosphere samples of wild, C1 and C3 *G. uralensis*.** The heatmap was scaled in the row direction based on the microbial relative abundance. WT: wild type; C1: cultivated for one year; C3: cultivated for three years.

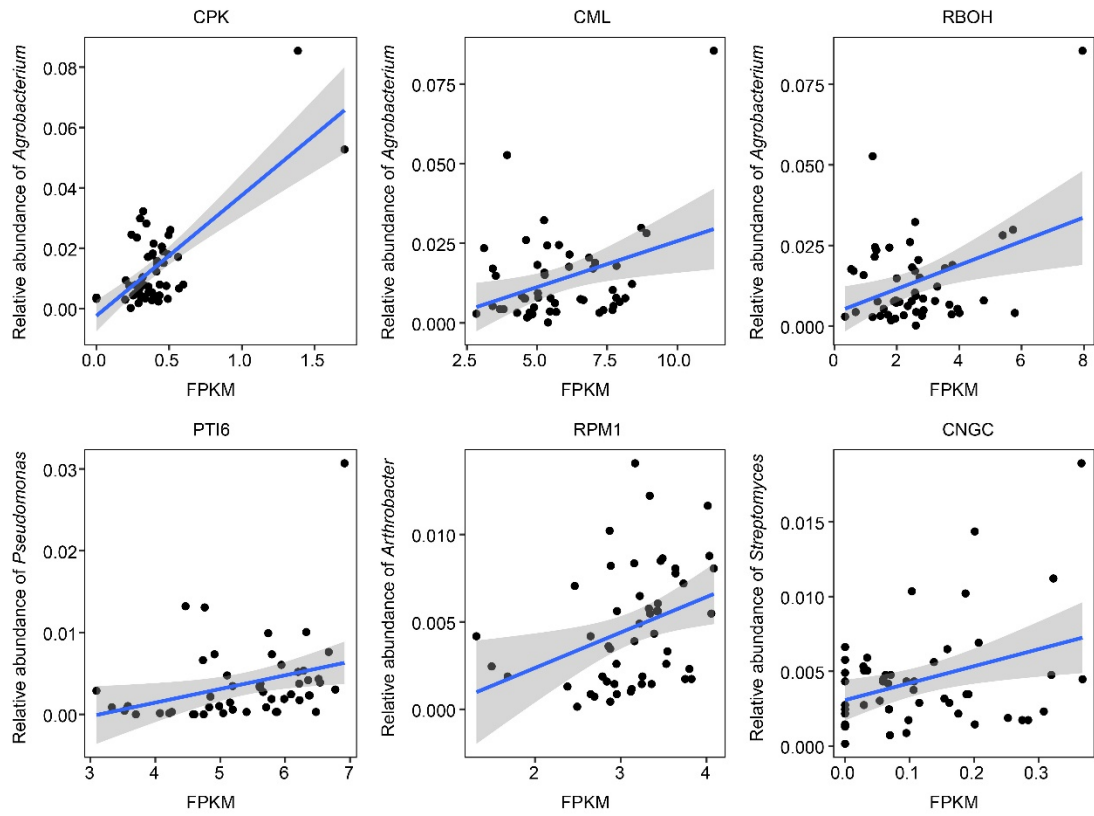

**Supplementary Figure S8. The correlation between pathogen abundance and the expression of genes related to plant-pathogen interaction in *G. uralensis*. Significance of the correlation using *t*-test,  $p < 0.05$**

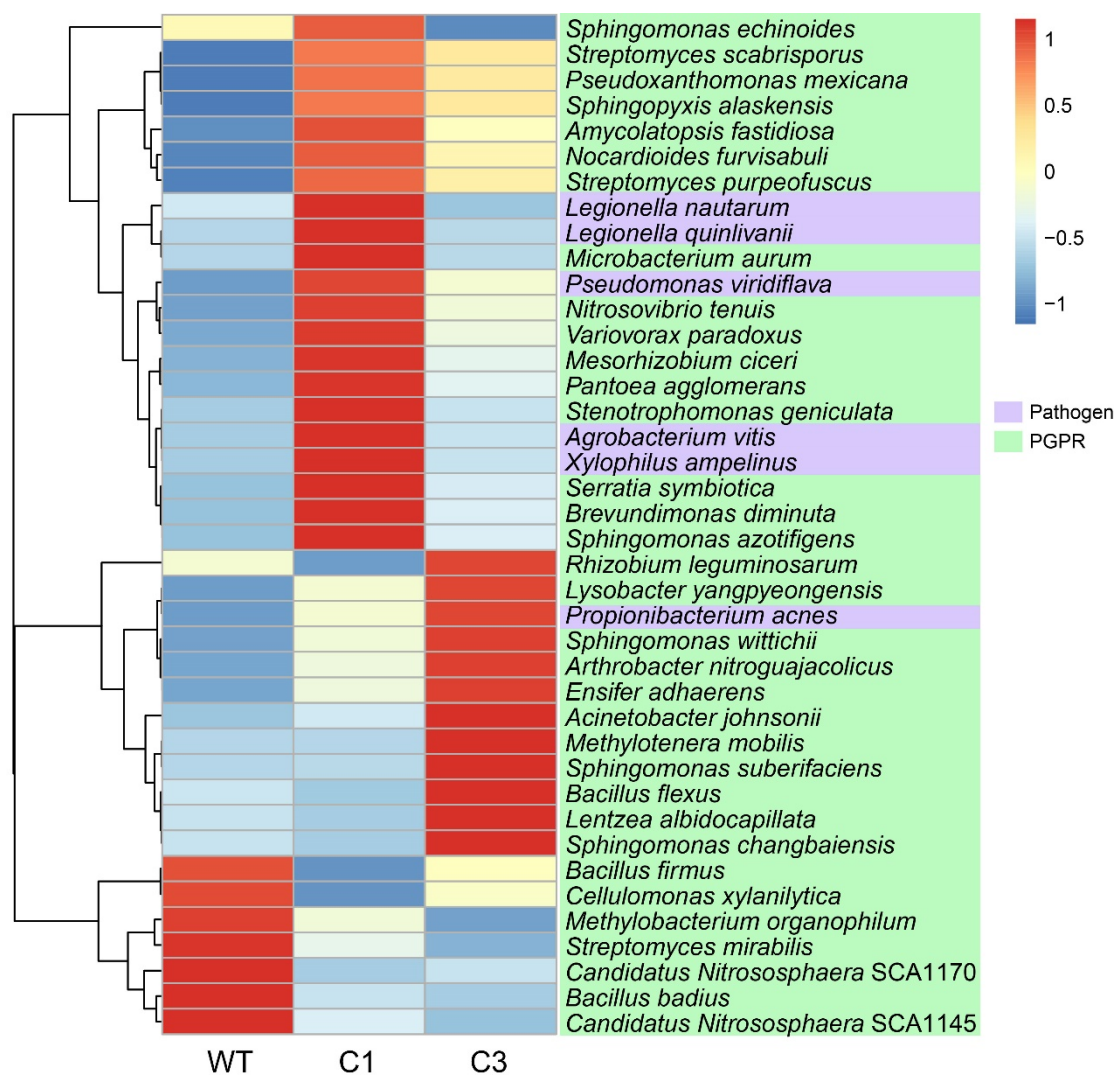

**Supplementary Figure S9. Marker PGPRs and pathogens at the species level in rhizosphere samples of wild, C1 and C3 *G. uralensis*.** The heatmap was scaled in the row direction based on the microbial relative abundance. WT: wild type; C1: cultivated for one year; C3: cultivated for three years.

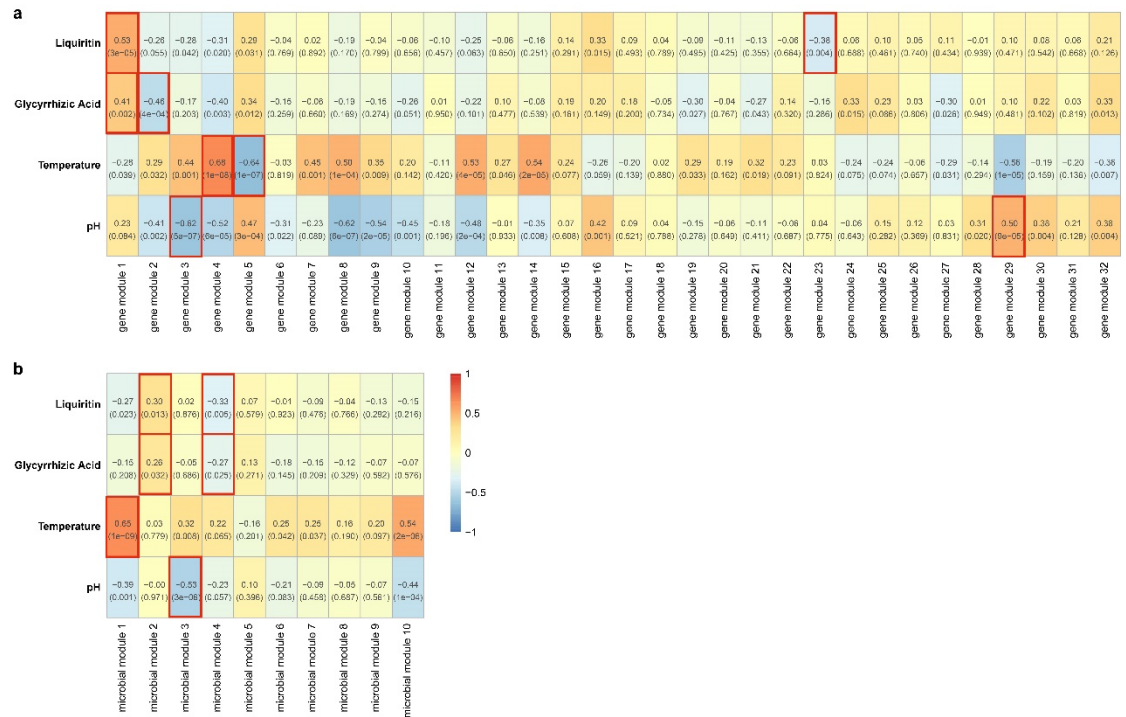

**Supplementary Figure S10. Matrix of Module-Trait Relationships (MTRs) and *p*-values for selected traits.** **a.** Correlation distribution of traits and gene modules. **b.** Correlation distribution of traits and microbial modules. Each row corresponded to a gene or microbial module, and each column corresponded to a histopathological trait. Each cell contained a corresponding correlation and *p*-value. The table was color-coded by correlation according to the color legend.

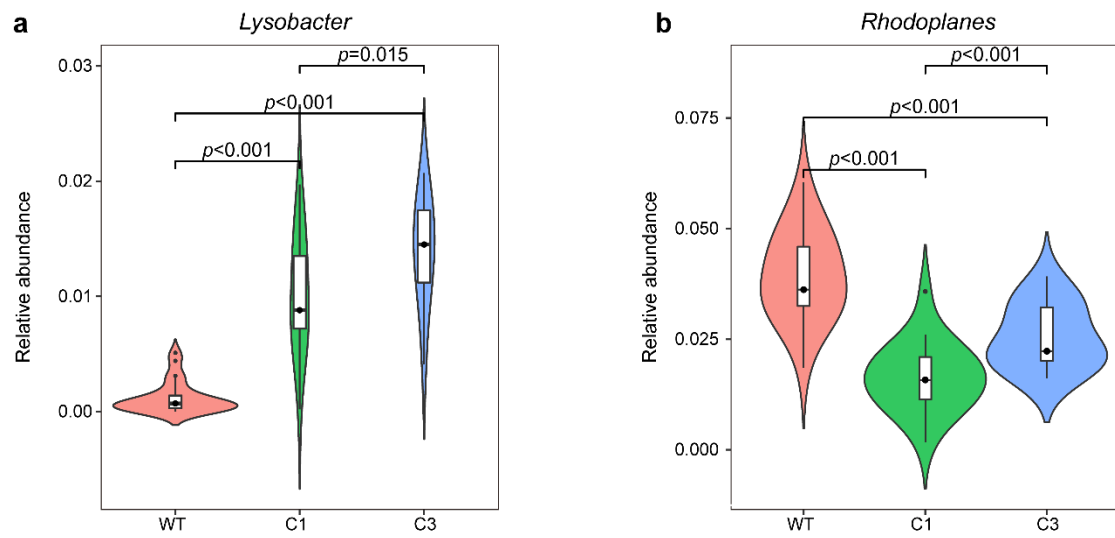

**Supplementary Figure S11. Relative abundance comparison of *Lysobacter* and *Rhodoplanes* in three types of *G. uralensis*.** **a.** Relative abundance comparison of *Lysobacter* in three types of *G. uralensis*: wild (WT), cultivated *G. uralensis* that were grown for one year (C1) and three years (C3). **b.** Relative abundance comparison of *Rhodoplanes* in wild, C1 and C3 *G. uralensis*.

## Supplementary Tables

Supplementary Table S1. The information about collected samples in this study

| Sample ID | Group | Transcriptome | Metabolome | Rhizosphere microbiome | Soil microbiome | Temperature | pH   | Village    |
|-----------|-------|---------------|------------|------------------------|-----------------|-------------|------|------------|
| WT1       | Wild  | √             | √          | √                      | √               | 22.47       | 6.87 | Shiji Quan |
| WT2       | Wild  | √             | √          | √                      | √               | 19.70       | 6.70 | Shiji Quan |
| WT3       | Wild  | √             | √          | √                      | √               | 19.30       | 6.80 | Shiji Quan |
| WT4       | Wild  | √             | √          | √                      | √               | 19.43       | 6.83 | Shiji Quan |
| WT5       | Wild  | √             | √          | √                      | √               | 19.53       | 6.87 | Shiji Quan |
| WT6       | Wild  | √             | √          | √                      | √               | 19.53       | 6.87 | Shiji Quan |
| WT7       | Wild  | √             | √          | √                      | √               | 19.83       | 6.87 | Shiji Quan |
| WT8       | Wild  | √             | √          | √                      | √               | 18.87       | 6.90 | Shiji Quan |
| WT9       | Wild  | √             | √          | √                      | √               | 19.40       | 6.93 | Shiji Quan |
| WT10      | Wild  | √             | √          | √                      | √               | 19.37       | 6.87 | Shiji Quan |
| WT11      | Wild  | √             | √          | √                      | √               | 19.27       | 6.90 | Shiji Quan |
| WT12      | Wild  | √             | √          | √                      | √               | 20.50       | 6.93 | Shiji Quan |
| WT13      | Wild  | √             | √          | √                      | √               | 20.90       | 6.87 | Shiji Quan |
| WT14      | Wild  | √             | √          | √                      | √               | 19.23       | 6.87 | Shiji Quan |
| WT15      | Wild  | √             | √          | √                      | √               | 19.50       | 6.87 | Shiji Quan |
| WT16      | Wild  | √             | √          | √                      | √               | 19.77       | 6.87 | Shiji Quan |
| WT17      | Wild  | √             | √          | √                      | √               | 21.33       | 6.90 | Shiji Quan |
| WT18      | Wild  | √             | √          | √                      | √               | 21.60       | 6.93 | Shiji Quan |
| WT19      | Wild  | √             | √          | √                      | √               | 20.30       | 6.87 | Shiji Quan |
| WT20      | Wild  | ×             | √          | √                      | √               | 20.37       | 6.90 | Shiji Quan |
| WT21      | Wild  | ×             | √          | √                      | √               | 21.63       | 6.93 | Shiji Quan |

|       |                            |   |   |   |   |       |      |              |
|-------|----------------------------|---|---|---|---|-------|------|--------------|
| WT22  | Wild                       | × | √ | √ | √ | 21.57 | 6.80 | Shiji Quan   |
| WT23  | Wild                       | × | √ | √ | √ | 20.43 | 6.90 | Shiji Quan   |
| WT24  | Wild                       | × | √ | √ | √ | 20.13 | 6.93 | Shiji Quan   |
| WT25  | Wild                       | √ | √ | √ | √ | 19.50 | 6.93 | Shiji Quan   |
| C1-1  | Cultivated for<br>one year | × | √ | √ | √ | 27.77 | 6.63 | TianJi Zhang |
| C1-2  | Cultivated for<br>one year | √ | √ | √ | √ | 23.47 | 6.90 | TianJi Zhang |
| C1-3  | Cultivated for<br>one year | × | √ | √ | √ | 22.50 | 6.57 | TianJi Zhang |
| C1-4  | Cultivated for<br>one year | × | √ | × | √ | 22.47 | 6.87 | TianJi Zhang |
| C1-5  | Cultivated for<br>one year | × | √ | √ | √ | 19.70 | 6.77 | TianJi Zhang |
| C1-6  | Cultivated for<br>one year | √ | √ | × | √ | 23.83 | 6.73 | TianJi Zhang |
| C1-7  | Cultivated for<br>one year | × | √ | √ | √ | 20.67 | 6.80 | TianJi Zhang |
| C1-8  | Cultivated for<br>one year | √ | √ | √ | √ | 22.10 | 6.77 | TianJi Zhang |
| C1-9  | Cultivated for<br>one year | × | √ | √ | √ | 18.17 | 6.80 | TianJi Zhang |
| C1-10 | Cultivated for<br>one year | √ | √ | √ | × | 19.83 | 6.80 | TianJi Zhang |
| C1-11 | Cultivated for<br>one year | × | √ | √ | √ | 21.23 | 6.80 | TianJi Zhang |

|       |                            |   |   |   |   |       |      |              |
|-------|----------------------------|---|---|---|---|-------|------|--------------|
| C1-12 | Cultivated for<br>one year | √ | √ | √ | √ | 22.13 | 6.90 | TianJi Zhang |
| C1-13 | Cultivated for<br>one year | × | √ | √ | √ | 20.63 | 6.87 | TianJi Zhang |
| C1-14 | Cultivated for<br>one year | × | √ | √ | √ | 20.77 | 6.83 | TianJi Zhang |
| C1-15 | Cultivated for<br>one year | × | √ | √ | √ | 21.83 | 6.83 | TianJi Zhang |
| C1-16 | Cultivated for<br>one year | √ | √ | √ | √ | 22.47 | 6.77 | TianJi Zhang |
| C1-17 | Cultivated for<br>one year | × | √ | × | √ | 24.93 | 6.67 | TianJi Zhang |
| C1-18 | Cultivated for<br>one year | × | √ | √ | √ | 23.10 | 6.80 | TianJi Zhang |
| C1-19 | Cultivated for<br>one year | × | √ | √ | √ | 21.03 | 6.77 | TianJi Zhang |
| C1-20 | Cultivated for<br>one year | √ | √ | √ | √ | 20.57 | 6.70 | TianJi Zhang |
| C1-21 | Cultivated for<br>one year | √ | √ | √ | √ | 23.17 | 6.83 | TianJi Zhang |
| C1-22 | Cultivated for<br>one year | × | √ | √ | √ | 21.03 | 6.70 | TianJi Zhang |
| C1-23 | Cultivated for<br>one year | √ | √ | × | √ | 22.13 | 6.70 | TianJi Zhang |
| C1-24 | Cultivated for<br>one year | × | √ | √ | √ | 23.93 | 6.80 | TianJi Zhang |

|       |                            |   |   |   |   |       |      |              |
|-------|----------------------------|---|---|---|---|-------|------|--------------|
| C1-25 | Cultivated for one year    | √ | √ | √ | √ | 22.17 | 6.73 | TianJi Zhang |
| C3-1  | Cultivated for three years | √ | √ | √ | √ | 20.13 | 5.93 | TianJi Zhang |
| C3-2  | Cultivated for three years | √ | √ | √ | √ | 20.37 | 6.37 | TianJi Zhang |
| C3-3  | Cultivated for three years | √ | √ | √ | √ | 21.63 | 6.17 | TianJi Zhang |
| C3-4  | Cultivated for three years | √ | √ | √ | √ | 20.10 | 6.30 | TianJi Zhang |
| C3-5  | Cultivated for three years | √ | √ | √ | √ | 21.87 | 6.20 | TianJi Zhang |
| C3-6  | Cultivated for three years | √ | √ | √ | √ | 20.73 | 6.67 | TianJi Zhang |
| C3-7  | Cultivated for three years | √ | √ | × | √ | 22.90 | 6.87 | TianJi Zhang |
| C3-8  | Cultivated for three years | √ | √ | √ | √ | 21.87 | 6.53 | TianJi Zhang |
| C3-9  | Cultivated for three years | √ | √ | √ | √ | 23.27 | 6.63 | TianJi Zhang |
| C3-10 | Cultivated for three years | √ | √ | √ | × | 23.43 | 6.77 | TianJi Zhang |
| C3-11 | Cultivated for three years | √ | √ | √ | √ | 22.60 | 6.90 | TianJi Zhang |
| C3-12 | Cultivated for three years | √ | √ | √ | √ | 23.17 | 6.90 | TianJi Zhang |

|       |                            |   |   |   |   |       |      |              |
|-------|----------------------------|---|---|---|---|-------|------|--------------|
| C3-13 | Cultivated for three years | √ | √ | √ | √ | 23.40 | 6.67 | TianJi Zhang |
| C3-14 | Cultivated for three years | √ | √ | √ | √ | 22.67 | 6.67 | TianJi Zhang |
| C3-15 | Cultivated for three years | √ | √ | × | √ | 22.07 | 6.70 | TianJi Zhang |
| C3-16 | Cultivated for three years | √ | √ | √ | √ | 22.27 | 6.60 | TianJi Zhang |
| C3-17 | Cultivated for three years | √ | √ | √ | √ | 23.37 | 6.80 | TianJi Zhang |
| C3-18 | Cultivated for three years | √ | √ | √ | √ | 23.70 | 6.80 | TianJi Zhang |
| C3-19 | Cultivated for three years | × | √ | √ | √ | 20.80 | 6.37 | TianJi Zhang |
| C3-20 | Cultivated for three years | √ | √ | √ | √ | 23.43 | 6.50 | TianJi Zhang |
| C3-21 | Cultivated for three years | √ | √ | √ | √ | 24.57 | 6.60 | TianJi Zhang |
| C3-22 | Cultivated for three years | √ | √ | √ | √ | 22.40 | 6.77 | TianJi Zhang |
| C3-23 | Cultivated for three years | √ | √ | √ | √ | 24.20 | 6.70 | TianJi Zhang |
| C3-24 | Cultivated for three years | √ | √ | √ | √ | 24.37 | 6.70 | TianJi Zhang |
| C3-25 | Cultivated for three years | √ | √ | √ | √ | 24.57 | 6.83 | TianJi Zhang |

---



**Supplementary Table S2. The sequencing information about collected samples in this study**

| <b>Sample ID</b> | <b>Transcriptome reads</b> | <b>Rhizosphere microbial reads</b> | <b>Soil microbial reads</b> |
|------------------|----------------------------|------------------------------------|-----------------------------|
| WT1              | 47,799,762                 | 400,528                            | 176,054                     |
| WT2              | 45,806,484                 | 189,932                            | 167,000                     |
| WT3              | 49,128,144                 | 382,816                            | 234,160                     |
| WT4              | 49,736,312                 | 157,834                            | 168,762                     |
| WT5              | 49,562,546                 | 138,304                            | 199,314                     |
| WT6              | 50,328,210                 | 149,168                            | 168,806                     |
| WT7              | 48,621,854                 | 215,694                            | 152,826                     |
| WT8              | 47,933,578                 | 136,396                            | 191,286                     |
| WT9              | 49,289,478                 | 195,346                            | 179,722                     |
| WT10             | 48,650,092                 | 144,366                            | 179,848                     |
| WT11             | 52,775,672                 | 146,752                            | 185,208                     |
| WT12             | 49,808,910                 | 159,218                            | 161,952                     |
| WT13             | 50,809,828                 | 190,604                            | 177,764                     |
| WT14             | 49,552,490                 | 174,858                            | 171,240                     |
| WT15             | 53,064,638                 | 219,576                            | 163,848                     |
| WT16             | 53,606,680                 | 205,562                            | 160,432                     |
| WT17             | 46,267,576                 | 204,158                            | 203,290                     |
| WT18             | 52,714,148                 | 167,140                            | 177,852                     |
| WT19             | 46,935,588                 | 171,038                            | 157,722                     |
| WT20             | 48,314,440                 | 180,042                            | 171,066                     |
| WT21             | NA                         | 181,796                            | 164,166                     |
| WT22             | NA                         | 241,556                            | 169,176                     |
| WT23             | NA                         | 227,396                            | 150,436                     |
| WT24             | NA                         | 180,296                            | 150,346                     |
| WT25             | 48,585,478                 | 227,990                            | 190,586                     |
| C1-1             | NA                         | 253,700                            | 607,660                     |
| C1-2             | 53,158,416                 | 218,252                            | 487,962                     |
| C1-3             | NA                         | 176,908                            | 152,608                     |
| C1-4             | NA                         | NA                                 | 457,266                     |
| C1-5             | NA                         | 161,536                            | 410,804                     |
| C1-6             | 47,593,790                 | NA                                 | 397,380                     |
| C1-7             | NA                         | 197,306                            | 219,880                     |
| C1-8             | 47,005,566                 | 273,836                            | 450,092                     |
| C1-9             | NA                         | 257,980                            | 166,014                     |
| C1-10            | 46,437,566                 | 258,426                            | NA                          |
| C1-11            | NA                         | 239,264                            | 189,280                     |
| C1-12            | 51,321,014                 | 215,728                            | 138,882                     |
| C1-13            | NA                         | 179,416                            | 184,200                     |
| C1-14            | NA                         | 270,336                            | 138,306                     |
| C1-15            | NA                         | 221,146                            | 164,180                     |

|       |               |            |            |
|-------|---------------|------------|------------|
| C1-16 | 47,401,372    | 230,258    | 143,486    |
| C1-17 | NA            | NA         | 207,412    |
| C1-18 | NA            | 194,856    | 191,304    |
| C1-19 | NA            | 206,756    | 174,420    |
| C1-20 | 52,750,846    | 213,478    | 195,206    |
| C1-21 | 41,451,592    | 175,506    | 168,234    |
| C1-22 | NA            | 193,622    | 209,870    |
| C1-23 | 50,120,412    | NA         | 184,580    |
| C1-24 | NA            | 255,850    | 152,680    |
| C1-25 | 53,908,780    | 265,948    | 262,156    |
| C3-1  | 52,668,672    | 197,414    | 176,842    |
| C3-2  | 55,034,984    | 219,394    | 189,492    |
| C3-3  | 51,528,026    | 187,290    | 194,388    |
| C3-4  | 50,487,742    | 224,396    | 154,718    |
| C3-5  | 55,257,210    | 169,948    | 200,256    |
| C3-6  | 50,548,492    | 236,964    | 237,324    |
| C3-7  | 53,428,780    | NA         | 213,306    |
| C3-8  | 51,302,848    | 203,874    | 190,526    |
| C3-9  | 55,931,934    | 204,620    | 201,700    |
| C3-10 | 52,775,118    | 217,712    | NA         |
| C3-11 | 67,279,696    | 184,602    | 167,376    |
| C3-12 | 47,713,652    | 211,490    | 155,358    |
| C3-13 | 54,059,372    | 220,440    | 160,420    |
| C3-14 | 44,550,252    | 153,562    | 153,240    |
| C3-15 | 57,015,350    | NA         | 235,204    |
| C3-16 | 43,860,278    | 144,962    | 172,462    |
| C3-17 | 43,846,454    | 153,058    | 183,532    |
| C3-18 | 44,476,450    | 135,682    | 177,118    |
| C3-19 | NA            | 152,994    | 165,606    |
| C3-20 | 47,960,128    | 214,072    | 178,848    |
| C3-21 | 52,199,638    | 442,414    | 186,660    |
| C3-22 | 45,853,510    | 396,372    | 183,778    |
| C3-23 | 52,590,556    | 208,094    | 227,364    |
| C3-24 | 49,218,040    | 254,240    | 200,952    |
| C3-25 | 48,620,476    | 358,548    | 188,470    |
| Total | 2,758,648,920 | 14,740,616 | 14,921,664 |
